# Supplementary material for: Association Between Preoperative Benzodiazepine Use and Postoperative Opioid Use and Health Care Costs
Source: PubMed Central journal article supplement (PMC7592026; doi:10.1001/jamanetworkopen.2020.18761), 2020-10-27
Supplement: jamanetwopen-e2018761-s001.pdf [file jamanetwopen-e2018761-s001.pdf]

## Supplementary Online Content

Rishel CA, Zhang Y, Sun EC. Association between preoperative benzodiazepine use and postoperative opioid use and health care costs. *JAMA Netw Open*. 2020;3(10):e2018761. doi:10.1001/jamanetworkopen.2020.18761

**eFigure 1.** Sample Population Flow Chart

**eTable 1.** List of CPT Codes

**eTable 2.** Benzodiazepine Conversion Factors to Calculate Diazepam Milligram Equivalents (DMEs)

**eFigure 2.** Average Number of Prescriptions per Benzodiazepine Medication During Preoperative Year

**eReferences**

This supplementary material has been provided by the authors to give readers additional information about their work.

**eFigure 1. Sample population flow chart**

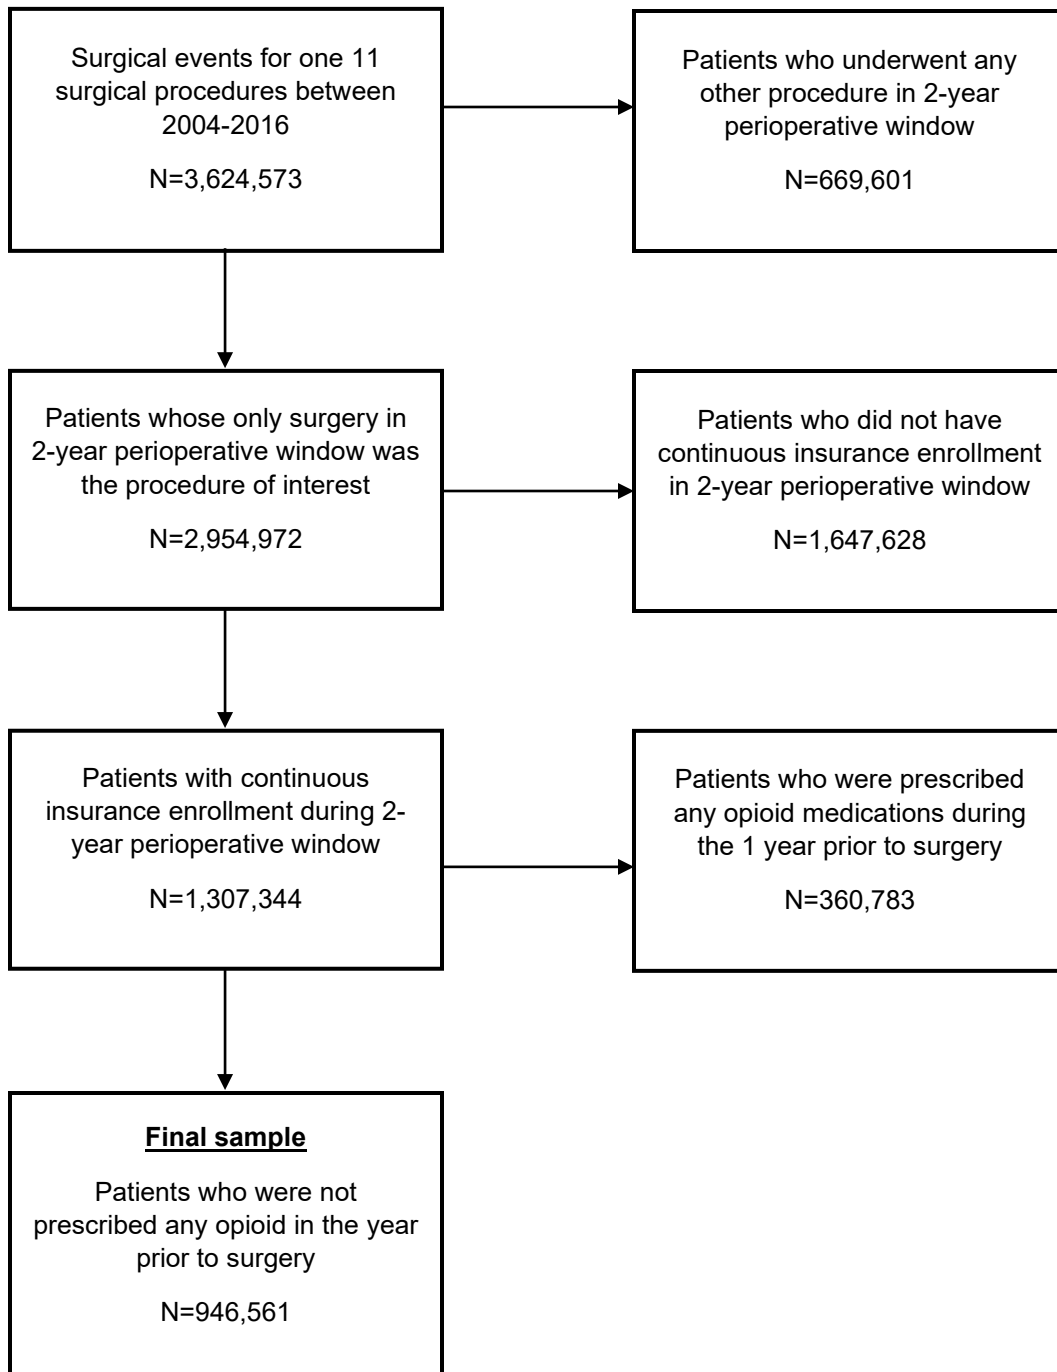

**eTable 1.** List of CPT codes<sup>5</sup>

| <b>Procedure name</b>                   | <b>CPT codes</b>                                              |
|-----------------------------------------|---------------------------------------------------------------|
| Total Knee Arthroplasty                 | 27447                                                         |
| Total Hip Arthroplasty                  | 27130                                                         |
| Laparoscopic Cholecystectomy            | 47562, 47563, 47564                                           |
| Open Cholecystectomy                    | 47600, 47605, 47610                                           |
| Laparoscopic Appendectomy               | 44970, 44979                                                  |
| Open Appendectomy                       | 44950, 44960                                                  |
| Cesarean Section                        | 59510, 59514, 59515                                           |
| Functional Endoscopic Sinus Surgery     | 31237, 31240, 31254, 31255, 31256, 31267, 31276, 31287, 31288 |
| Cataract Surgery                        | 66982, 66983, 66984                                           |
| Transurethral Resection of the Prostate | 52601, 52612, 52614                                           |
| Simple Mastectomy                       | 19301, 19302, 19303, 19180                                    |

**eTable 2. Benzodiazepine conversion factors to calculate diazepam milligram equivalents (DMEs)<sup>1-4</sup>**

| <b>Generic name of benzodiazepine</b> | <b>Dose equal to 10 mg of diazepam**</b> |
|---------------------------------------|------------------------------------------|
| Alprazolam                            | 1 mg                                     |
| Chlordiazepoxide                      | 25 mg                                    |
| Clonazepam                            | 2 mg                                     |
| Chlorazepate                          | 7.5 mg                                   |
| Diazepam                              | 10 mg                                    |
| Estazolam                             | 1 mg                                     |
| Flurazepam                            | 15 mg                                    |
| Lorazepam                             | 2 mg                                     |
| Oxazepam                              | 10 mg                                    |
| Quazepam                              | 15 mg                                    |
| Temazepam                             | 15 mg                                    |
| Triazolam                             | 0.25 mg                                  |

**eFigure 2.** Average number of prescriptions per benzodiazepine medication during preoperative year

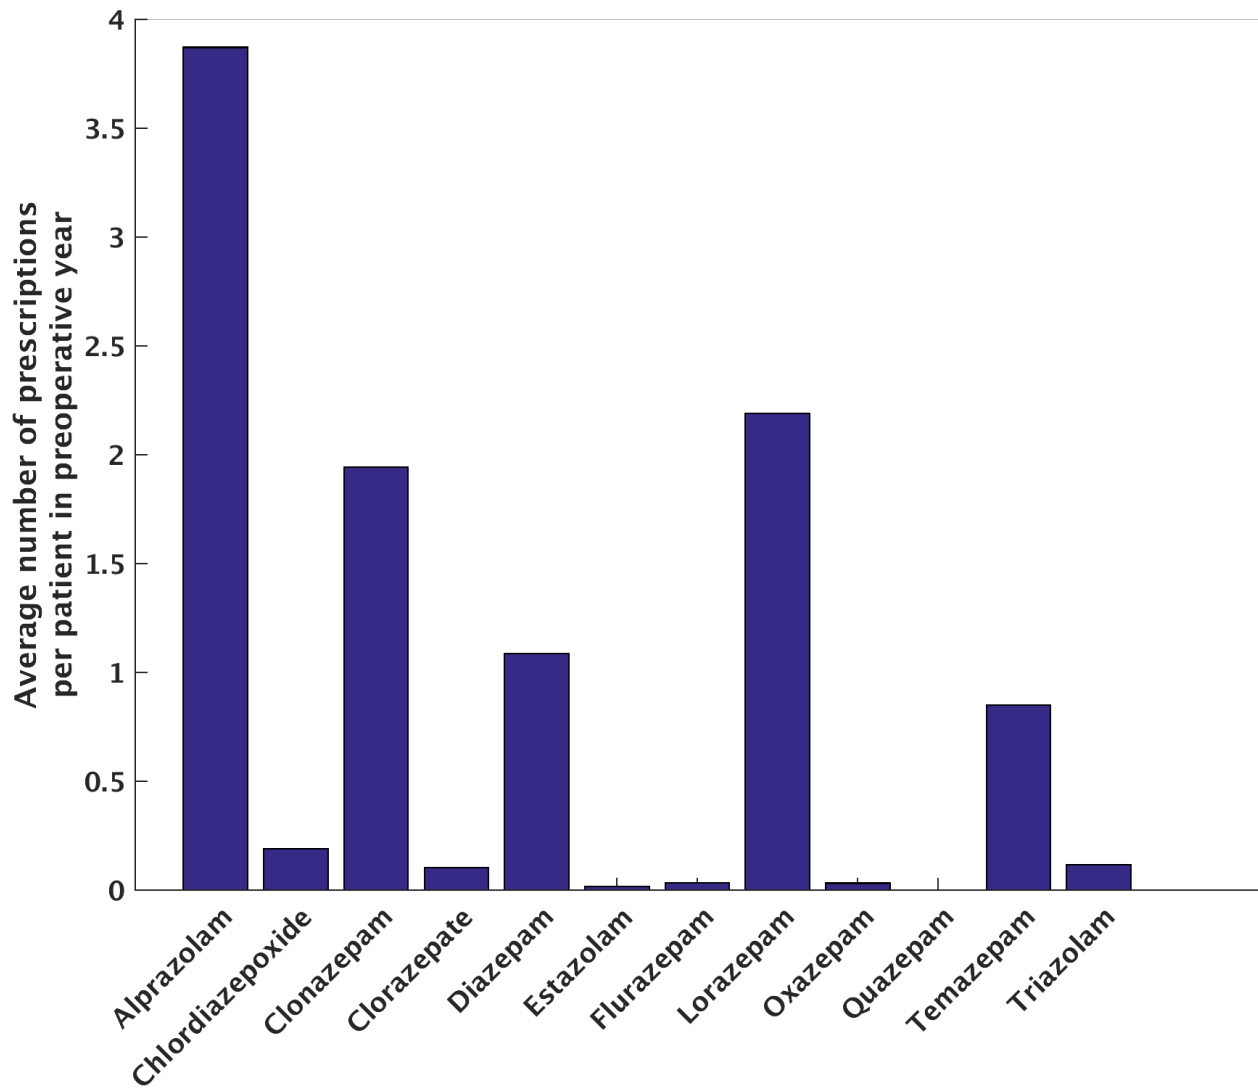

## eReferences

1. Miller, N. S. & Kipnis, S. S. *Detoxification and Substance Abuse Treatment. Detoxification and Substance Abuse Treatment* (Substance Abuse and Mental Health Services Administration (US), 2006).
2. Miller, N. S. & Gold, M. S. Management of withdrawal syndromes and relapse prevention in drug and alcohol dependence. *Am. Fam. Physician* **58**, 139–46 (1998).
3. Lieberman, J. A. & Allan, T. *Handbook of Psychiatric Drugs*. (John Wiley & Sons Ltd., 2006).
4. Ashton, C. H. *Benzodiazepines: How They Work and How to Withdraw*. (2002).
5. Sun, E. C., Darnall, B. D., Baker, L. C. & Mackey, S. Incidence of and Risk Factors for Chronic Opioid Use Among Opioid-Naive Patients in the Postoperative Period. *JAMA Intern. Med.* **176**, 1286 (2016).
